# Supplementary material for: A Mechanistic Framework for In Vitro–In Vivo Extrapolation of Liver Membrane Transporters: Prediction of Drug–Drug Interaction Between Rosuvastatin and Cyclosporine
Source: PubMed Central journal article supplement — Clin Pharmacokinet. 2013 Jul 24;53(1):73–87. doi: 10.1007/s40262-013-0097-y (PMC3889821; doi:10.1007/s40262-013-0097-y), 2013-07-24
Supplement: 40262_2013_97_MOESM2_ESM.pdf [file 40262_2013_97_MOESM2_ESM.pdf]

**A Mechanistic Framework for In Vitro – In Vivo Extrapolation of Liver  
Membrane Transporters: Prediction of Drug-Drug Interaction between  
Rosuvastatin and Cyclosporine.**

M. Jamei<sup>1\*</sup>, F. Bajot<sup>1,†</sup>, S. Neuhoff<sup>1</sup>, Z. Barter<sup>1</sup>, J. Yang<sup>1,‡</sup>, A. Rostami-Hodjegan<sup>1,2</sup>  
and K. Rowland-Yeo<sup>1</sup>

<sup>1</sup>*Simcyp Limited, Blades Enterprise Centre, Sheffield, UK;* <sup>2</sup>*Centre of Applied Pharmacokinetic  
Research, the School of Pharmacy and Pharmaceutical Sciences, the University of  
Manchester, Manchester, UK*

---

<sup>†</sup> Current position: Computational Toxicology, British American Tobacco, Southampton, UK

<sup>‡</sup> Current position: Clinical Pharmacology Modelling and Simulation, GSK, Shanghai, China

## Supplementary Materials 2

Simulated versus observed plasma concentration-time profiles of rosuvastatin in healthy volunteers following the oral administration of 10, 20, 40 and 80 mg, respectively.

**Table S1** – Details of the single dose clinical studies used for Rosuvastatin performance verification

| <b>PK Study</b> | <b>Dose [mg]</b> | <b>Age range [years]</b> | <b>n</b> | <b>% female</b> | <b>Reference</b> |
|-----------------|------------------|--------------------------|----------|-----------------|------------------|
| 1               | 10               | 22-42                    | 11       | 0               | [1]              |
| 2               | 10               | 31-60                    | 18       | 0               | [2]              |
| 3               | 20               | 31-60                    | 9        | 0               | [2]              |
| 4               | 40               | 31-60                    | 9        | 0               | [2]              |
| 5               | 40               | 21-51                    | 10       | 0               | [3]              |
| 6               | 40               | 21-39                    | 36       | 13.9            | [4]              |
| 7               | 80               | 22-44                    | 11       | 0               | [5]              |
| 8               | 80               | 25-56                    | 14       | 0               | [1]              |
| 9               | 80               | 29-51                    | 14       | 0               | [6]              |
| 10              | 80               | 31-60                    | 18       | 0               | [2]              |
| 11              | 80               | 35-47                    | 20       | 15              | [7]              |

**PK study 1**

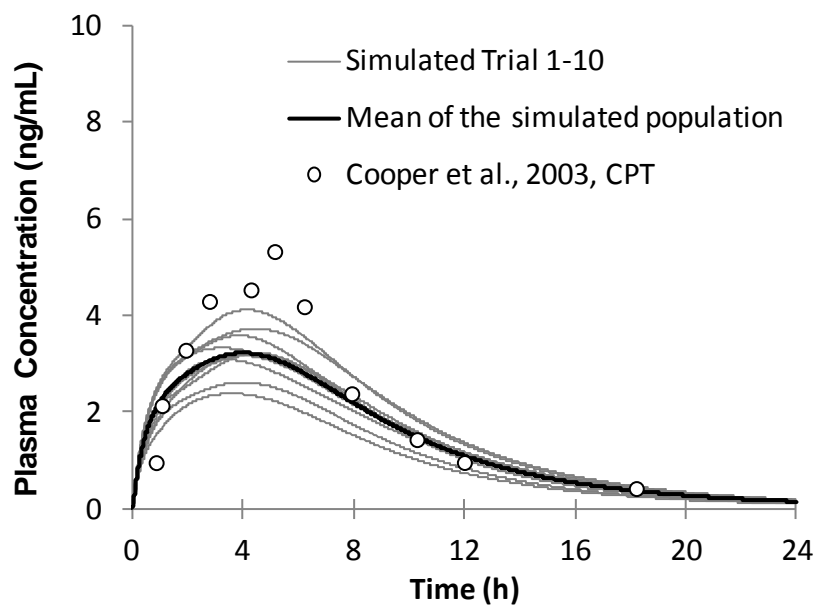

**Fig. S1** - Simulated *versus* observed plasma concentration-time profiles of rosuvastatin in healthy volunteers following the oral administration of 10 mg. The grey thin lines represent simulated individual trials (10) of 11 male subjects (22-42 years) and the solid black line represents the simulated mean of the healthy volunteers population (n=110). The circles denote mean values from the clinical study by Cooper *et al.* 2003 [1].

**PK study 2**

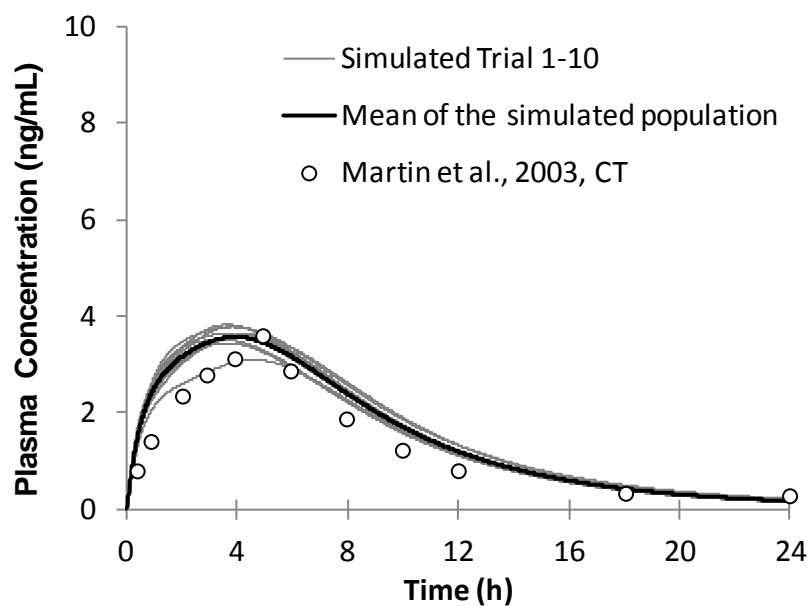

**Fig. S2** - Simulated *versus* observed plasma concentration-time profiles of rosuvastatin in healthy volunteers following the oral administration of 10 mg. The grey thin lines represent simulated individual trials (10) of 18 male subjects (31-60 years) and the solid black line represents the simulated mean of the healthy volunteers population (n=180). The circles denote mean values from the clinical study by Martin *et al.* 2003 [2].

**PK study 3**

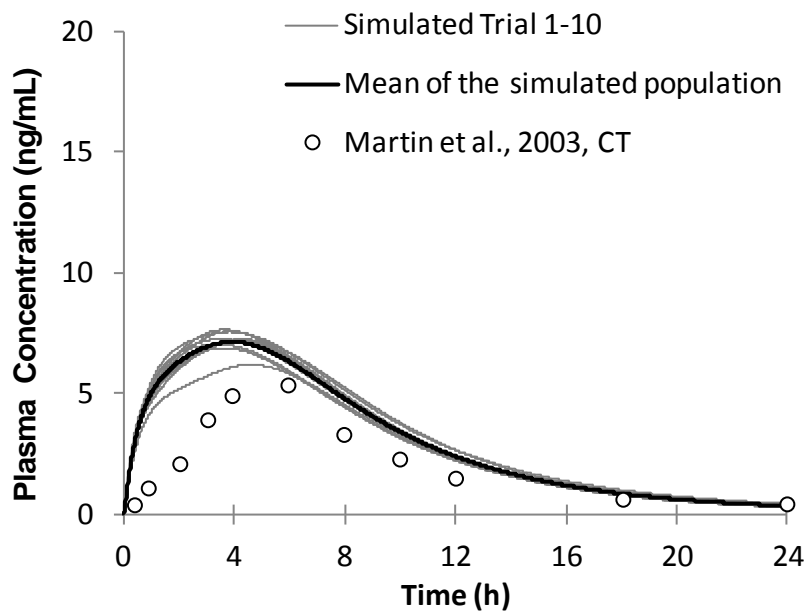

**Fig. S3** - Simulated *versus* observed plasma concentration-time profiles of rosuvastatin in healthy volunteers following the oral administration of 20 mg. The grey thin lines represent simulated individual trials (10) of 9 male subjects (31-60 years) and the solid black line represents the simulated mean of the healthy volunteers population (n=90). The circles denote mean values from the clinical study by Martin *et al.* 2003 [2].

**PK study 4**

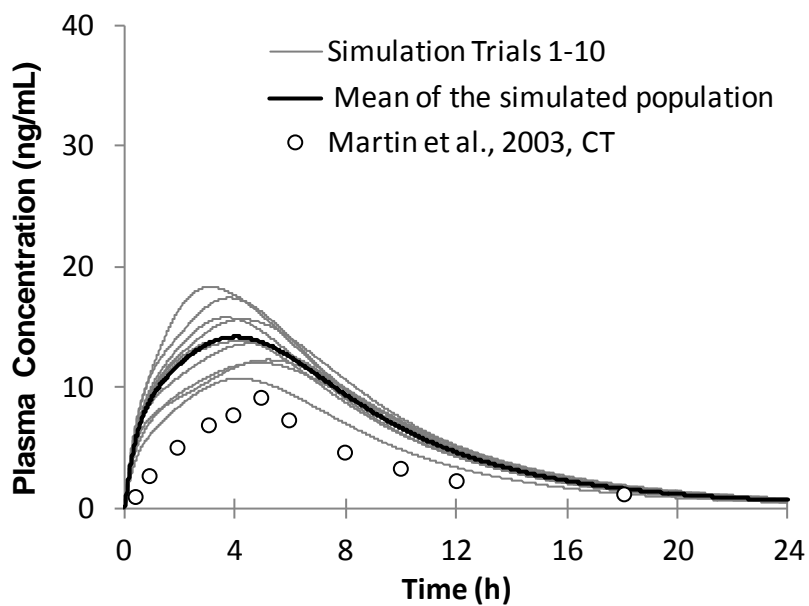

**Fig. S4** - Simulated *versus* observed plasma concentration-time profiles of rosuvastatin in healthy volunteers following the oral administration of 40 mg. The grey thin lines represent simulated individual trials (10) of 9 male subjects (31-60 years) and the solid black line represents the simulated mean of the healthy volunteers population (n=90). The circles denote mean values from the clinical study by Martin *et al.* 2003 [2].

**PK study 5**

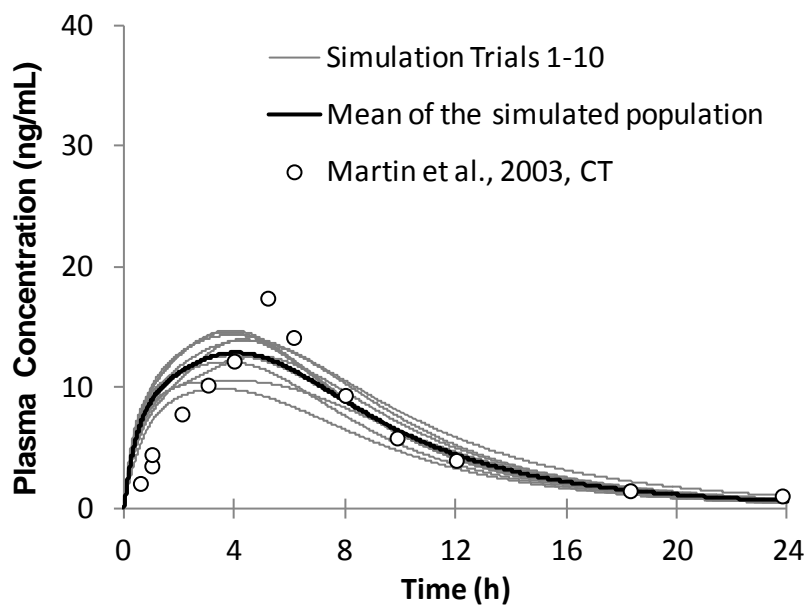

**Fig. S5** - Simulated *versus* observed plasma concentration-time profiles of rosuvastatin in healthy volunteers following the oral administration of 40 mg. The grey thin lines represent simulated individual trials (10) of 10 male subjects (21-51 years) and the solid black line represents the simulated mean of the healthy volunteers population (n=100). The circles denote mean values from the clinical study by Martin *et al.* 2003 [3].

**PK study 6**

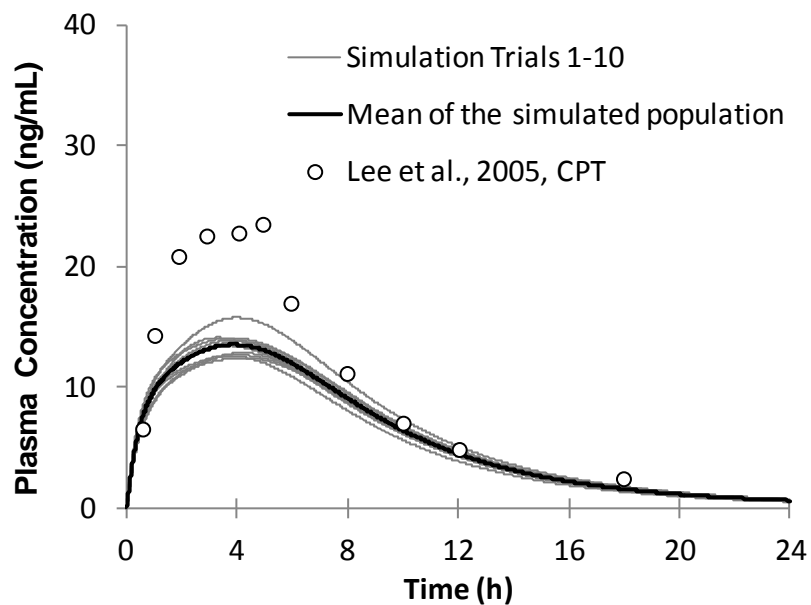

**Fig. S6** - Simulated *versus* observed plasma concentration-time profiles of rosuvastatin in healthy volunteers following the oral administration of 40 mg. The grey thin lines represent simulated individual trials (10) of 36 subjects (0.139% female, 21-39 years) and the solid black line represents the simulated mean of the healthy volunteers population (n=360). The circles denote mean values from the clinical study by Lee *et al.* 2005 [4].



**PK study 7**

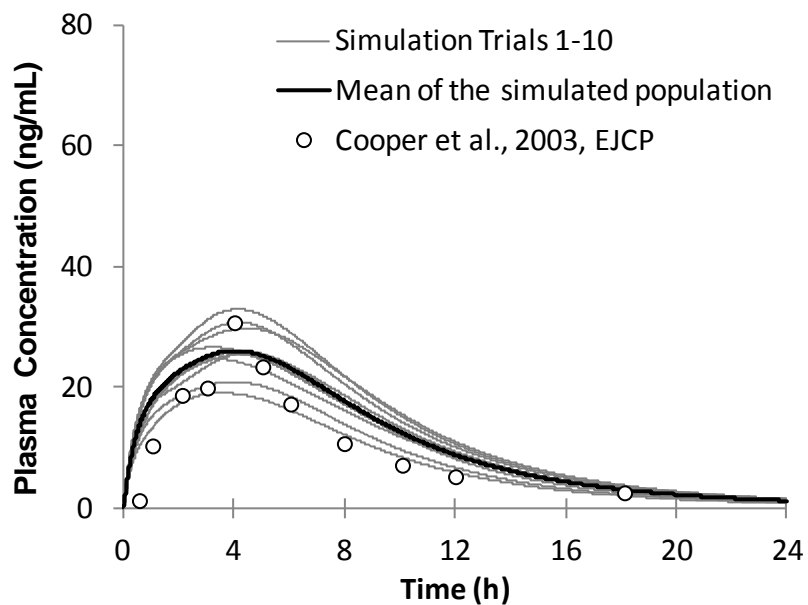

**Fig. S7** - Simulated *versus* observed plasma concentration-time profiles of rosuvastatin in healthy volunteers following the oral administration of 80 mg. The grey thin lines represent simulated individual trials (10) of 11 male subjects (22-44 years) and the solid black line represents the simulated mean of the healthy volunteers population (n=110). The circles denote mean values from the clinical study by Cooper *et al.* 2003 [5].

**PK study 8**

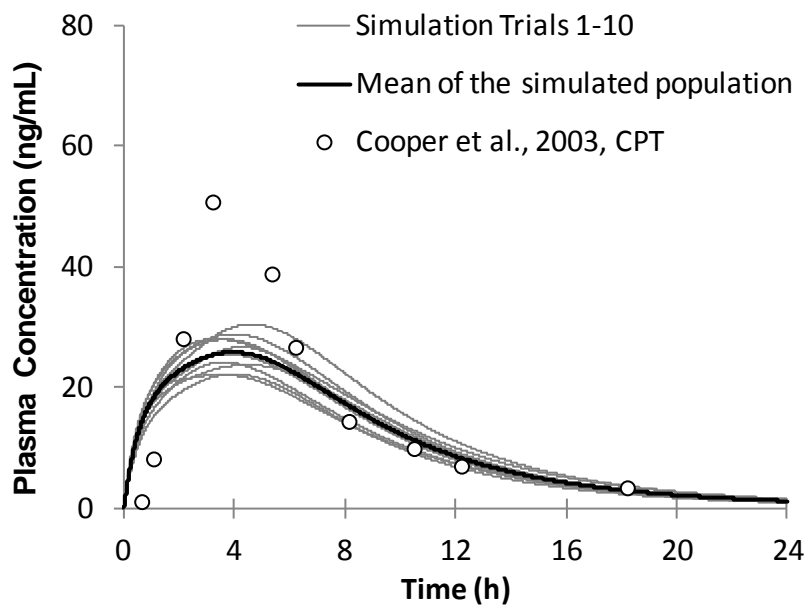

**Fig. S8** - Simulated *versus* observed plasma concentration-time profiles of rosuvastatin in healthy volunteers following the oral administration of 80 mg. The grey thin lines represent simulated individual trials (10) of 14 male subjects (25-56 years) and the solid black line represents the simulated mean of the healthy volunteers population (n=140). The circles denote mean values from the clinical study by Cooper *et al.* 2003 [1].

**PK study 9**

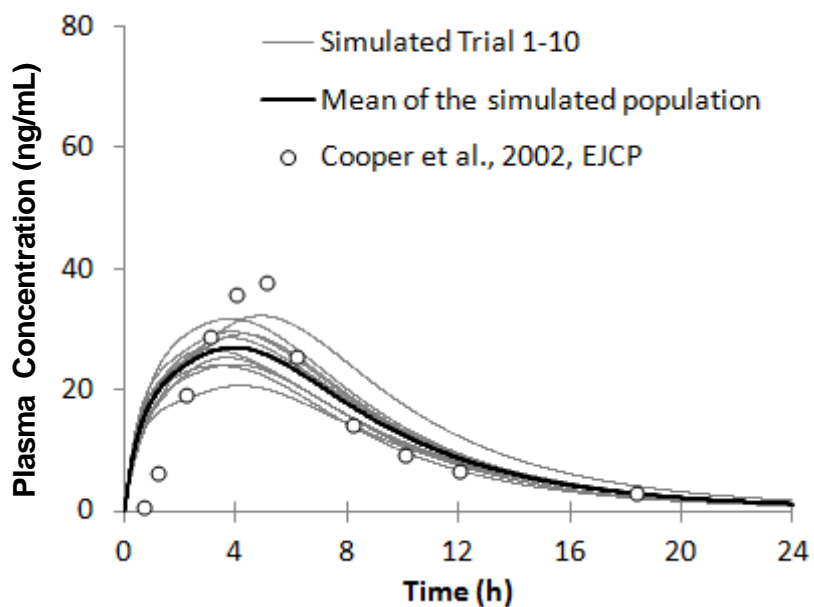

**Fig. S9** - Simulated *versus* observed plasma concentration-time profiles of rosuvastatin in healthy volunteers following the oral administration of 80 mg. The grey thin lines represent simulated individual trials (10) of 14 male subjects (29-51 years) and the solid black line represents the simulated mean of the healthy volunteers population (n=140). The circles denote mean values from the clinical study by Cooper *et al.* 2002 [6].

**PK study 10**

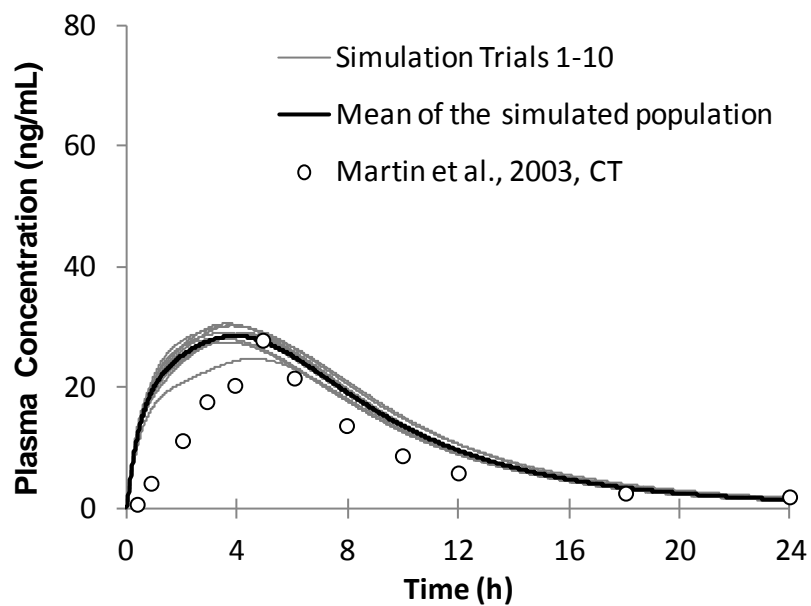

**Fig. S10** - Simulated *versus* observed plasma concentration-time profiles of rosuvastatin in healthy volunteers following the oral administration of 80 mg. The grey thin lines represent simulated individual trials (10) of 18 male subjects (31-60 years) and the solid black line represents the simulated mean of the healthy volunteers population (n=180). The circles denote mean values from the clinical study by Martin *et al.* 2003 [2].

**PK study 11**

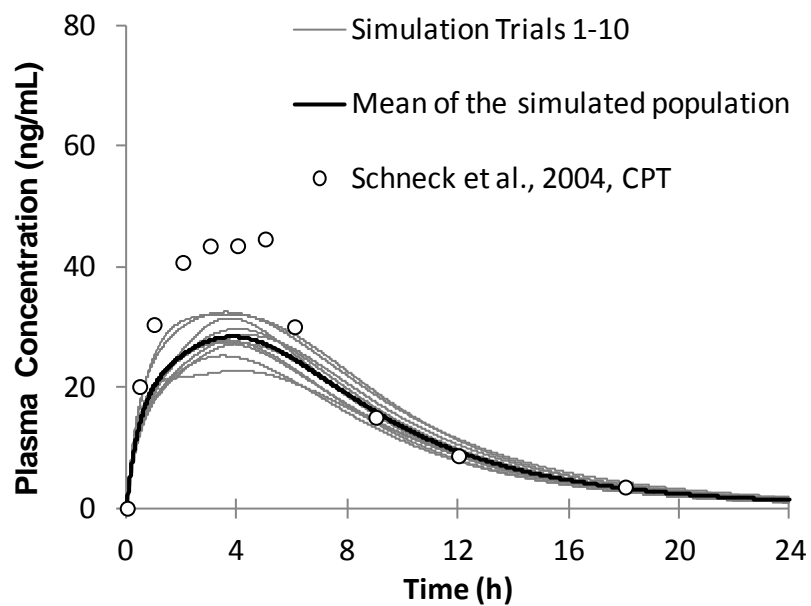

**Fig. S11** - Simulated *versus* observed plasma concentration-time profiles of rosuvastatin in healthy volunteers following the oral administration of 80 mg. The grey thin lines represent simulated individual trials (10) of 20 subjects (0.15% female, 35-47 years) and the solid black line represents the simulated mean of the healthy volunteers population (n=200). The circles denote mean values from the clinical study by Schneck *et al.* 2004 [7].

## References

1. Cooper KJ, Martin PD, Dane AL, Warwick MJ, Schneck DW, Cantarini MV. Effect of itraconazole on the pharmacokinetics of rosuvastatin. *Clin Pharmacol Ther.* 2003;73(4):322-9.
2. Martin PD, Warwick MJ, Dane AL, Cantarini MV. A double-blind, randomized, incomplete crossover trial to assess the dose proportionality of rosuvastatin in healthy volunteers. *Clin Ther.* 2003;25(8):2215-24.
3. Martin PD, Warwick MJ, Dane AL, Brindley C, Short T. Absolute oral bioavailability of rosuvastatin in healthy white adult male volunteers. *Clin Ther.* 2003;25(10):2553-63.
4. Lee E, Ryan S, Birmingham B, Zalikowski J, March R, Ambrose H, et al. Rosuvastatin pharmacokinetics and pharmacogenetics in white and Asian subjects residing in the same environment. *Clin Pharmacol Ther.* 2005;78(4):330-41.
5. Cooper KJ, Martin PD, Dane AL, Warwick MJ, Raza A, Schneck DW. The effect of erythromycin on the pharmacokinetics of rosuvastatin. *Eur J Clin Pharmacol.* 2003;59(1):51-6.
6. Cooper KJ, Martin PD, Dane AL, Warwick MJ, Schneck DW, Cantarini MV. The effect of fluconazole on the pharmacokinetics of rosuvastatin. *Eur J Clin Pharmacol.* 2002;58(8):527-31.
7. Schneck DW, Birmingham BK, Zalikowski JA, Mitchell PD, Wang Y, Martin PD, et al. The effect of gemfibrozil on the pharmacokinetics of rosuvastatin. *Clin Pharmacol Ther.* 2004;75(5):455-63.
